# Supplementary material
Source: PubMed Central journal article supplement (PMC5737906)
Supplement: NIHMS804285-supplement-supplement_1.pdf [file NIHMS804285-supplement-supplement_1.pdf]

Table 3

*Correlations between Mother-reported Supportive Response to Adolescent Emotions<sup>a</sup> and BOLD Activation in Limbic Regions and Fusiform*

| Neural Region of BOLD activity | HC    | DEP                     | NSSI                     |
|--------------------------------|-------|-------------------------|--------------------------|
| R Amygdala                     | 0.01  | 0.19                    | <b>-0.29*</b>            |
| L Amygdala                     | 0.07  | 0.15                    | -0.20                    |
| R Hippocampus                  | <0.01 | <b>0.34<sup>+</sup></b> | -0.13                    |
| L Hippocampus                  | -0.01 | 0.25                    | -0.08                    |
| R Parahippocampus              | 0.04  | 0.13                    | <b>-0.35**</b>           |
| L Parahippocampus              | 0.22  | <b>0.29<sup>+</sup></b> | <b>-0.27*</b>            |
| R Fusiform                     | 0.06  | 0.03                    | -0.22                    |
| L Fusiform                     | 0.10  | 0.08                    | <b>-0.24<sup>+</sup></b> |

*Note.* R=right hemisphere. L = left hemisphere. HC = healthy controls. DEP = depressed only. NSSI = depressed + NSSI behavior.

<sup>a</sup> Assessed using the Emotion Socialization Measure, a maternal report of parenting response style to child emotional experiences of sadness, anger, or fear.

<sup>+</sup>  $p \leq 0.10$ . \*  $p < 0.05$ . \*\*  $p < 0.01$ .

**Behavioral data analysis.** Responses and reaction times (RT) were entered into repeated measures ANOVAs with 2 within-subjects factors: perspective (4 =self, mother, best friend and classmates), and valence (2=positive, negative) and a between-subjects factor: group (DEP+NSSI, DEP and HC). Responses were coded 1 for endorsement of positive descriptors and not endorsement of negative descriptors, denying positive or endorsing negatives was coded 0.

## Results

**Endorsement of Self Descriptors:** There was a main effect of valence  $F(1, 78) = 61.78$ ,  $p < 0.01$ , with negative descriptors been denied more than positive were endorsed, and a main effect of group  $F(2, 78) = 6.27$ ,  $p < 0.01$ , with both DEP ( $M=0.5$ ) and NSSI+DEP ( $M=0.5$ ) having lower

endorsement scores than HC ( $M=0.7$ ), indicative that HC were endorsing more positives and denying more negative than the two depression groups. There was no effect of perspective or group by perspective, valence by perspective interactions ( $F$ s between .96 and 1.54).

**Reaction Time (RT):** There were no differences due to valence, perspectives, or groups nor group by valence and/or perspectives interactions ( $F$ s between .01 and .65). There was a significant valence by perspective interaction,  $F(3, 234) = 3.2$ ,  $p < 0.05$  which consisted in higher RT for negative ( $M_{\text{negative}}=2171$  ms) versus positive ( $M_{\text{positive}}=2088$ ) descriptors for the direct perspective, similar RT ( $M_{\text{negative}}=2125$  ms,  $M_{\text{positive}}=2117$  ms) for the best friend perspective, but lower RT for negative versus positive descriptors for both the mother ( $M_{\text{negative}}=2100$  ms,  $M_{\text{positive}}=2168$  ms) and the classmates perspective ( $M_{\text{negative}}=2069$  ms,  $M_{\text{positive}}=2159$  ms); suggesting that *all* participants were faster to endorse positive descriptors for the self and the best friend perspective, but faster to endorse negative ones for the mother's and the classmates'
